# Supplementary material for: Pyrrolizidine Alkaloids: The Botanical Origin of Pollen Collected during the Flowering Period of Echium vulgare and the Stability of Pyrrolizidine Alkaloids in Bee Bread
Source: MDPI journal article supplement (doi:10.3390/molecules24122214), 2019-06-13
Supplement: s1 [file s1]

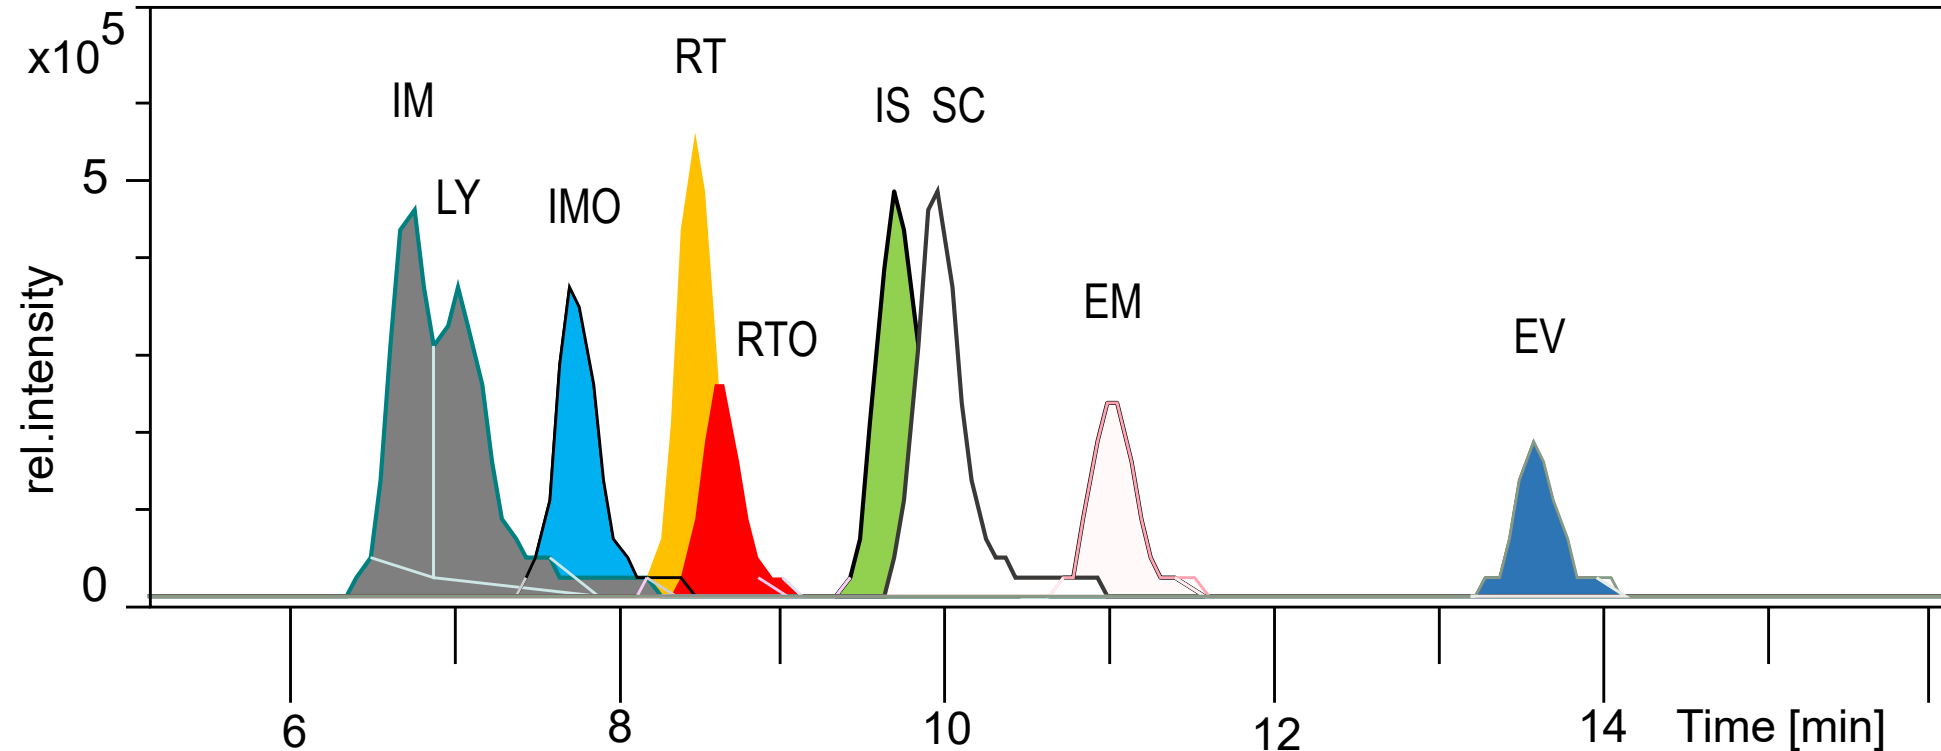

**Figure S1: detector responses of PA references in comparison to D3-atropine as IS.**

Response of standard-PAs: intermedine (IM), lycopsamine (LY), intermedine N-oxide (IMO), retrorsine (RT), retrorsine N-oxide (RTO), D3-atropine (IS), senecionine (SC), echimidine (EM) and echivulgarine (EV), 500pg on-column, each, solved in methanol ( $c=0.1\mu\text{g/mL}$ ).
